# Supplementary material for: Synthesis and characterization of indolocarbazole-quinoxalines with flat rigid structure for sensing fluoride and acetate anions
Source: Royal Society of Chemistry journal article supplement (doi:10.1039/b801447g), 2008-01-01
Supplement: b801447g.pdf [file b801447g.pdf]

## Supporting Information

# Synthesis and Characterization of Indolocarbazole-Quinoxalines with Flat Rigid Structure for Sensing Fluoride and Acetate Anions

Ting Wang, Yu Bai, Liang Ma, Xiu-Ping Yan\*

*Research Center for Analytical Science, College of Chemistry, Nankai  
University, Tianjin 300071, China*

### Complete Reference

5) P. A. Gale, M. D. Best, S. L. Tobey, E. V. Anslyn, J. L. Sessler, S. Camiolo, J. M. Llinares, D. Powell, K. Bowman-James, C. R. Bondy, S. J. Loeb, K. Choi, A. D. Hamilton, T. J. Wedge, M. F. Hawthorne, T. N. Lambert, B. D. Smith, A. P. Davis, J.-B. Joos, M. W. Hosseini, P. D. Beer, E. J. Hayes, 35 Years of Synthetic Anion Receptor Chemistry 1968-2003, *Coord. Chem. Rev.* 2003, **240**, 1-226.

9) P. A. Gale, F. P. Schmidtchen, P. Anzenbacher, Jr., R. Nishiyabu, M. A. Palacios, A. P. Davis, E. García-España, P. Díaz, J. M. Llinares, A. Bianchi, K. Wichmann, B. Antonioli, T. Söhnle, M. Wenzel, K. Gloe, J. R. Price, L. F. Lindoy, A. J. Blake, M. Schröder, E. A. Katayev, Y. A. Ustynyuk, J. L. Sessler, S. O. Kang, M. A. Hossain, K. Bowman-James, C. Schmuck, E. J. O'Neil, B. D. Smith, R. Martínez-Mañez, F. Sancenón, T. Gunnlaugsson, M. Glynn, G. M. Tocci, P. E. Kruger, F. M. Pfeffer, B. T. Nguyen, E. V. Anslyn, M. D. Ward, M. D. Lankshear, P. D. Beer, N.

Gimeno, R. Vilar, C. R. Rice, M. H. Filby, J. W. Steed, R. Quesada, Anion Coordination

Chemistry II. *Coord. Chem. Rev.*, 2006, **250**, 2917-3244.

### **UV-Vis Anion Recognition Study**

Stock solutions of the host molecule being studied were made up in dichloromethane with the final concentrations being between  $1.5 \times 10^{-5}$  M. Stock solutions of the guest in question were prepared by dissolving 100 - 300 equivalents of the tetrabutylammonium salts of the selected anions in 5 mL of a stock solution of the host. Making up the anion source solutions in this way allowed the binding studies to be carried out without having to make mathematical corrections to account for changes in host concentration as the result of dilution effects. The general procedure for the UV-Vis binding studies involved making sequential additions of titrant (anionic guest) using Hamilton pipettes to a 2 mL aliquot of the host stock solution in the spectrometric cell. The data was then collated and combined to produce plots that showed the changes in host spectral features as a function of changes in the concentration of the guest. Equilibrium constants were calculated using equation 4.5 of Connors. The change in absorbance,  $\Delta A$ , was calculated at a  $\lambda$  value where the spectral change was maximal.

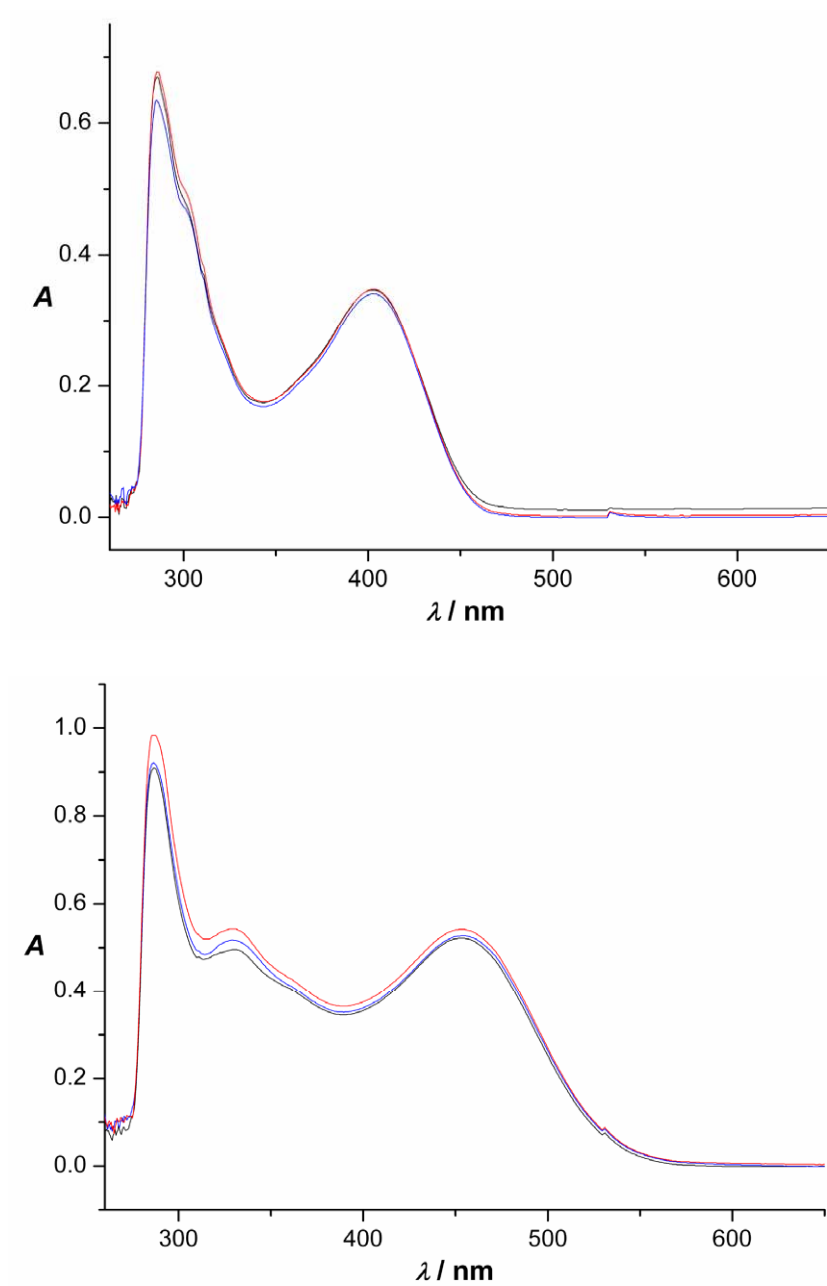

**Figure S1.** UV-vis spectral changes of receptors **4** (top) and **5** (bottom) ( $3.5 \times 10^{-5}$  M) observed upon addition of fluoride and acetate anions (10 equiv) in DMSO. Black line: receptor; Red line: receptor + F<sup>-</sup>; Blue line: receptor + CH<sub>3</sub>COO<sup>-</sup>.

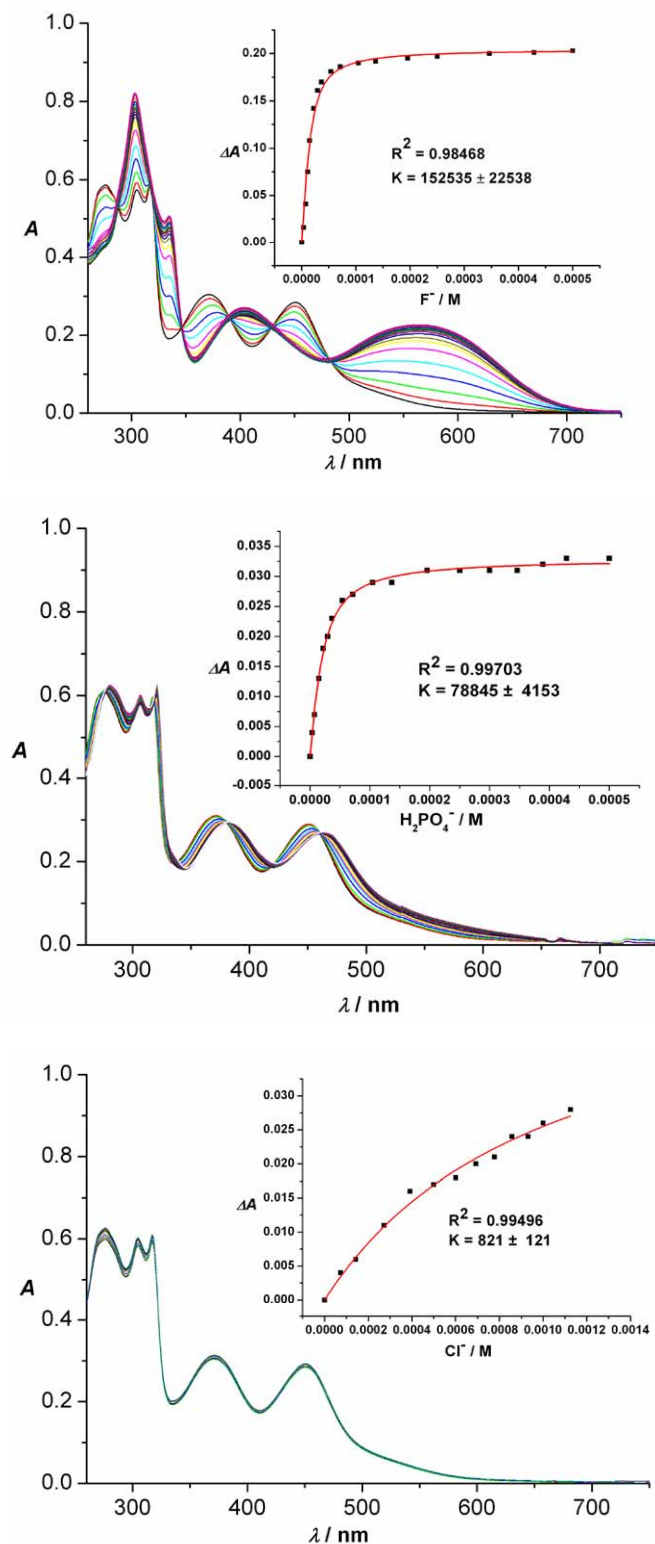

**Figure S2.** UV-vis spectral changes of receptor **7** ( $1.5 \times 10^{-5}$  M) observed during titration with  $F^-$  (top),  $H_2PO_4^-$  (middle) and  $Cl^-$  (bottom) in DMSO. (Inset) Binding isotherms

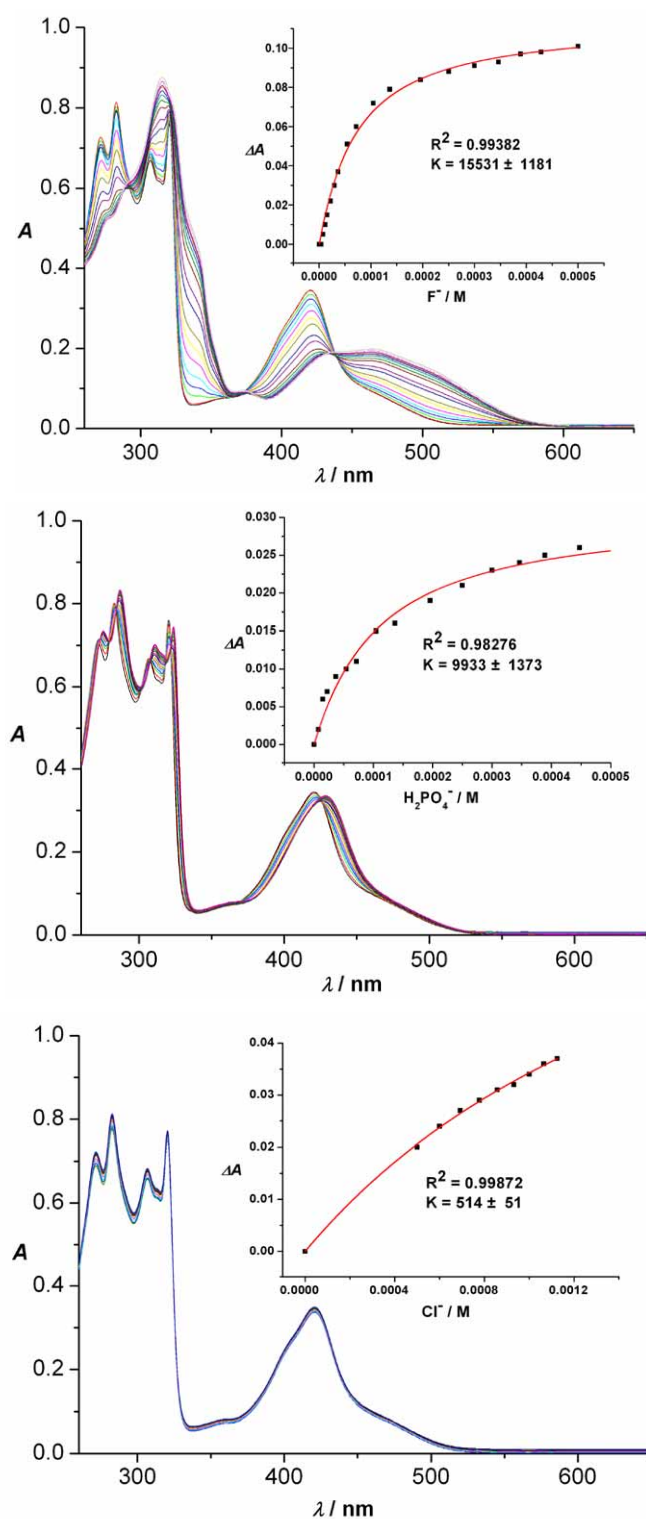

**Figure S3.** UV-vis spectral changes of receptor **6** ( $1.5 \times 10^{-5}$  M) observed during titration with  $F^-$  (top),  $H_2PO_4^-$  (middle) and  $Cl^-$  (bottom) in DMSO. (Inset) Binding isotherms

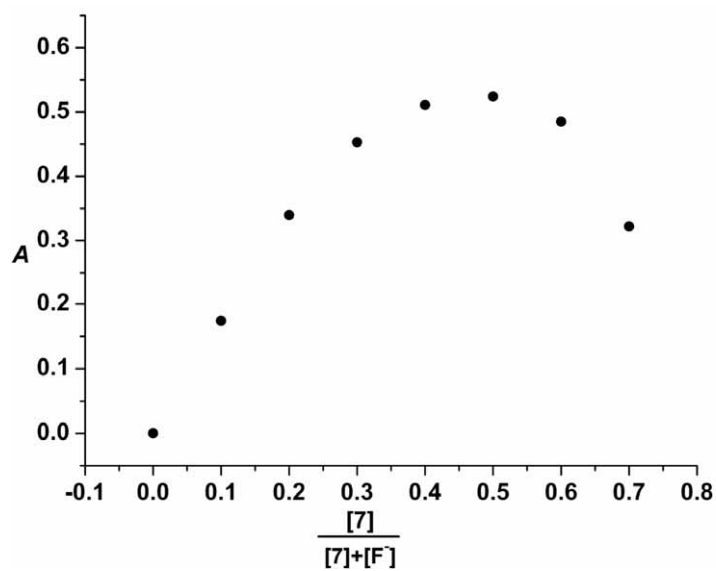

**Figure S4.** Job's plot for receptor **7** with fluoride anion, indicating 1:1 binding stoichiometry. **[7]**

+ [TBAF] =  $1.2 \times 10^{-4}$  M.

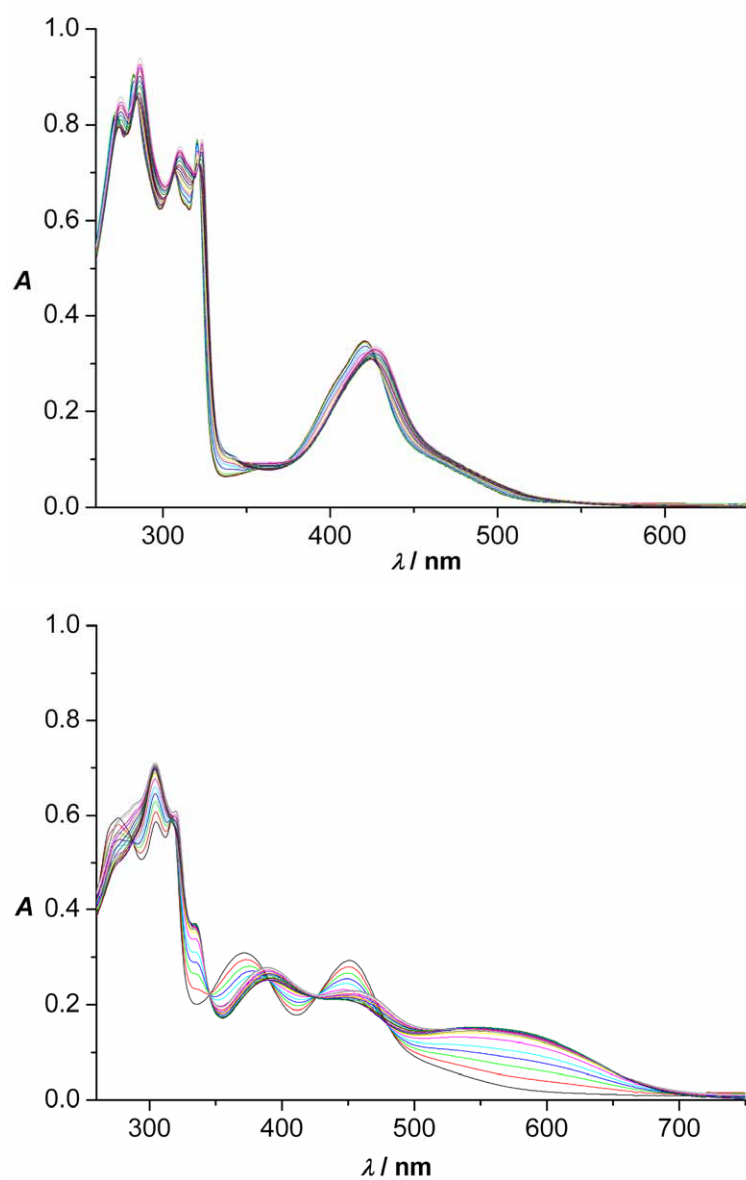

**Figure S5.** UV-vis spectral changes of receptors **6** (top) and **7** (bottom) upon the addition of acetate anion. Note the unclear isosbestic points. It may be caused by the biphasic behavior or the completion of water in the system. It is difficult to determine the binding constant through the UV-vis absorption titration.

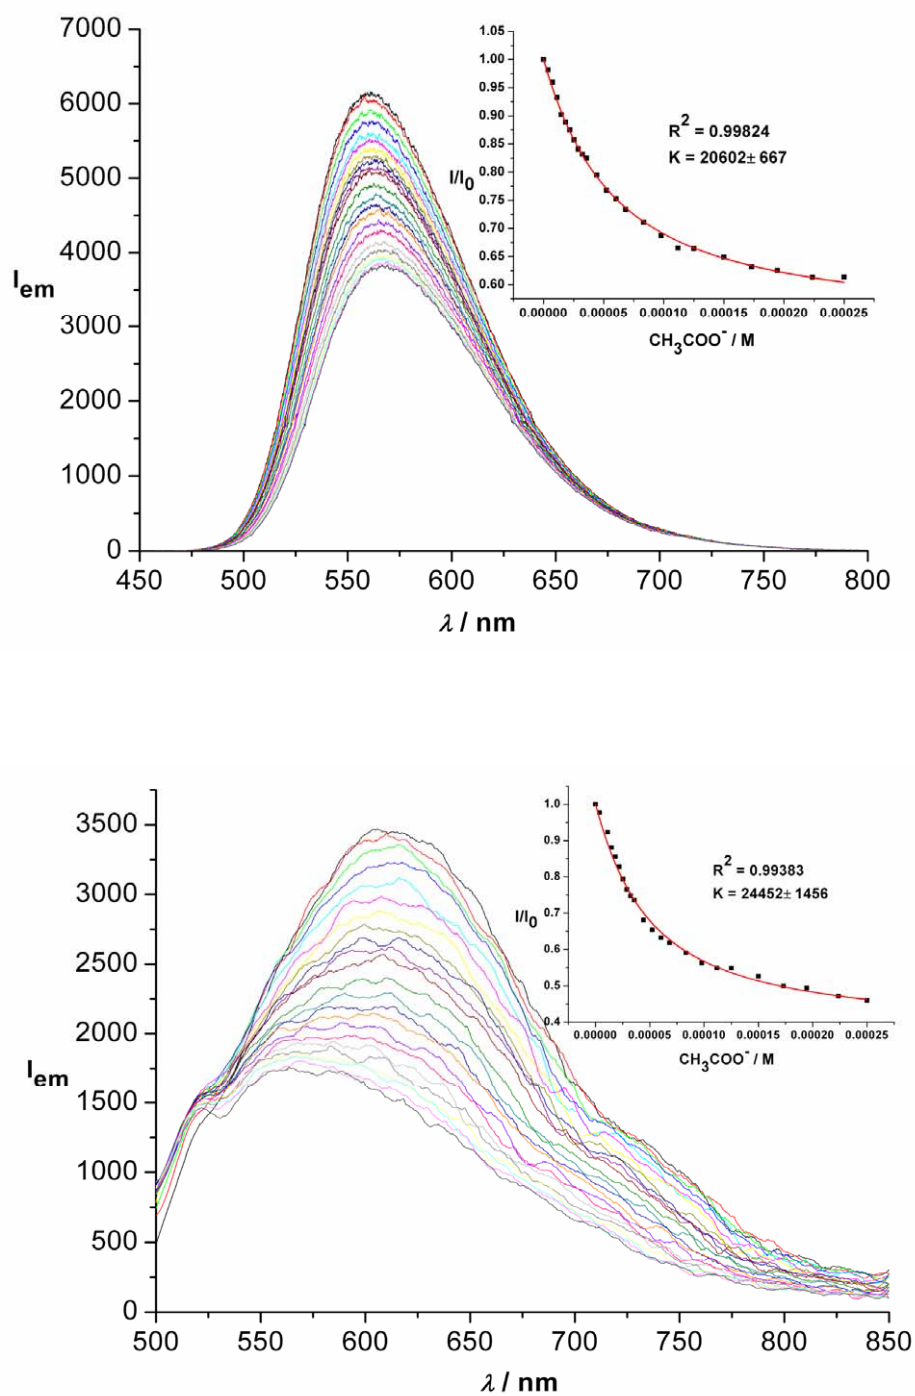

**Figure S6.** Fluorescence quenching of receptors **6** (top) and **7** (bottom) ( $1.5 \times 10^{-5}$  M) upon titration with  $CH_3COO^-$  in DMSO. (Inset) Titration plot.



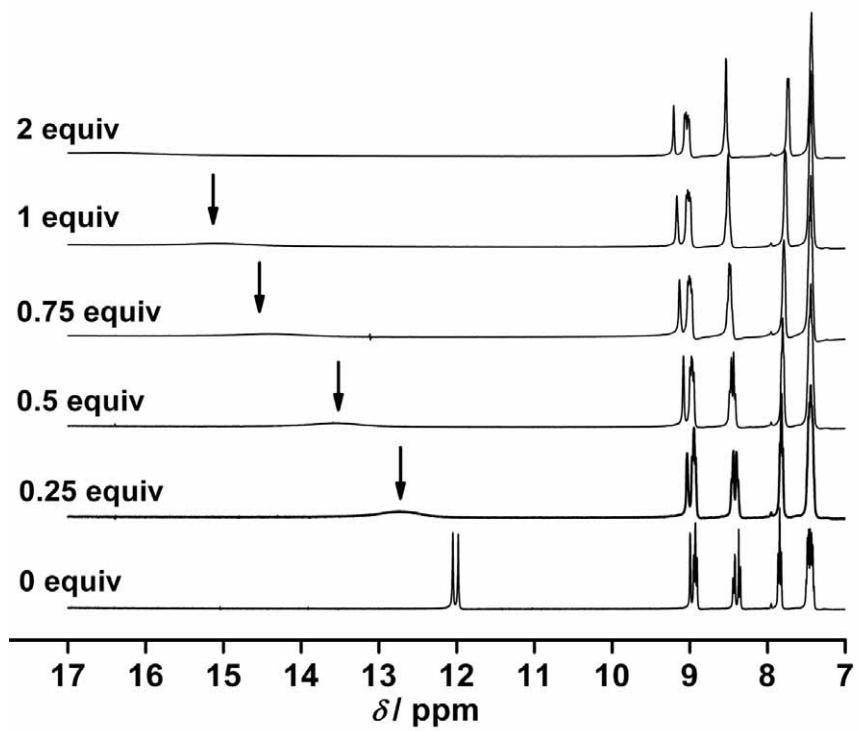

**Figure S7.**  $^1\text{H}$  NMR spectra of receptor 7 upon addition of  $\text{CH}_3\text{COO}^-$  in  $\text{DMSO-d}_6$

**Table S1.** Crystal data and structure refinement for 7·TBACl

|                                   |                                                                  |                  |
|-----------------------------------|------------------------------------------------------------------|------------------|
| Empirical formula                 | C <sub>40</sub> H <sub>49</sub> Cl N <sub>6</sub> O <sub>2</sub> |                  |
| Formula weight                    | 681.30                                                           |                  |
| Temperature                       | 113(2) K                                                         |                  |
| Wavelength                        | 0.71070 Å                                                        |                  |
| Crystal system                    | Triclinic,                                                       |                  |
| space group                       | P -1                                                             |                  |
| Unit cell dimensions              | a = 10.0553(19) Å                                                | α = 64.024(7)°.  |
|                                   | b = 13.715(2) Å                                                  | β = 80.245(12)°. |
|                                   | c = 15.384(3) Å                                                  | γ = 70.714(10)°. |
| Volume                            | 1799.5(6) Å <sup>3</sup>                                         |                  |
| Z                                 | 2                                                                |                  |
| Calculated density                | 1.257 Mg/m <sup>3</sup>                                          |                  |
| Absorption coefficient            | 0.150 mm <sup>-1</sup>                                           |                  |
| F(000)                            | 728                                                              |                  |
| Crystal size                      | 0.32 x 0.20 x 0.16 mm                                            |                  |
| Theta range for data collection   | 1.73 to 25.00°.                                                  |                  |
| Limiting indices                  | -11 ≤ h ≤ 11, -16 ≤ k ≤ 16, -17 ≤ l ≤ 18                         |                  |
| Reflections collected / unique    | 18561 / 6329 [R(int) = 0.0403]                                   |                  |
| Completeness to theta = 25.00°    | 99.9 %                                                           |                  |
| Absorption correction             | Semi-empirical from equivalents                                  |                  |
| Max. and min. transmission        | 0.9764 and 0.9535                                                |                  |
| Refinement method                 | Full-matrix least-squares on F <sup>2</sup>                      |                  |
| Data / restraints / parameters    | 6329 / 2 / 455                                                   |                  |
| Goodness-of-fit on F <sup>2</sup> | 1.057                                                            |                  |
| Final R indices [I > 2σ(I)]       | R1 = 0.0609, wR2 = 0.1600                                        |                  |
| R indices (all data)              | R1 = 0.0756, wR2 = 0.1702                                        |                  |

---

Largest diff. peak and hole 1.079 and -0.467 e.Å<sup>-3</sup>

---

**Table S2.** Crystal data and structure refinement for **7**·TBACH<sub>3</sub>COO·CHCl<sub>3</sub>·1/2H<sub>2</sub>O. Water molecule, a chloride atom of CHCl<sub>3</sub> and the nitro group of receptor **7** were disordered and refined in two positions with equal occupancies

---

|                                   |                                             |                 |
|-----------------------------------|---------------------------------------------|-----------------|
| Empirical formula                 | C43 H54 Cl3 N6 O4.50                        |                 |
| Formula weight                    | 833.27                                      |                 |
| Temperature                       | 113(2) K                                    |                 |
| Wavelength                        | 0.71073 Å                                   |                 |
| Crystal system                    | Triclinic                                   |                 |
| space group                       | P -1                                        |                 |
| Unit cell dimensions              | a = 12.077(2) Å                             | α = 108.73(3)°. |
|                                   | b = 13.878(3) Å                             | β = 107.18(3)°. |
|                                   | c = 14.279(3) Å                             | γ = 95.52(3)°.  |
| Volume                            | 2116.4(7) Å <sup>3</sup>                    |                 |
| Z                                 | 2                                           |                 |
| Calculated density                | 1.308 Mg/ m <sup>3</sup>                    |                 |
| Absorption coefficient            | 0.267 mm <sup>-1</sup>                      |                 |
| F(000)                            | 882                                         |                 |
| Crystal size                      | 0.14 x 0.12 x 0.08 mm                       |                 |
| Theta range for data collection   | 1.59 to 25.02°.                             |                 |
| Limiting indices                  | -14<=h<=14, -16<=k<=16, -16<=l<=13          |                 |
| Reflections collected / unique    | 13051 / 7406 [R(int) = 0.0260]              |                 |
| Completeness to theta = 25.02°    | 99.2 %                                      |                 |
| Absorption correction             | Semi-empirical from equivalents             |                 |
| Max. and min. transmission        | 0.9687 and 0.9485                           |                 |
| Refinement method                 | Full-matrix least-squares on F <sup>2</sup> |                 |
| Data / restraints / parameters    | 7406 / 92 / 643                             |                 |
| Goodness-of-fit on F <sup>2</sup> | 1.144                                       |                 |
| Final R indices [I>2σ(I)]         | R1 = 0.0537, wR2 = 0.1127                   |                 |
| R indices (all data)              | R1 = 0.0658, wR2 = 0.1181                   |                 |
| Largest diff. peak and hole       | 0.203 and -0.299 e. Å <sup>-3</sup>         |                 |

---
